# Supplementary material
Source: Research Square preprint supplement (doi:10.21203/rs.3.rs-9232817/v1)
Supplement: Supplementary file 1 [file 591f5731a09616c1083b3092.docx]

**Appendix 2**

*List of Instructions and Criteria for Parcours (second practical component in the ALFAC test battery)*

| Tasks | Criteria |
| --- | --- |
| (J-S)  During the whole *Parcours* | ***Failure if the child…***   - *Decides to stop the test;* - *Refuses to perform a task;* - *Touches or grabs intentionally the material, the swimming pool lane rope or the wall.* |
| (J) Entry in the water like a helicopter | **Correct performance if the child…**   - Stands in the starting space (moves less than a meter); - Jumps from the edge into the air, initiating the movement of turning around the longitudinal axis (90°); - Enters the water with feet first in the longitudinal axis; - Passively or actively rises to the water surface.   Note: The child is allowed to push the pool floor to get to the surface.  ***Failure if the child…***   - *Refuses to enter the water;* - *Does not jump off the wall;* - *Does not initiate the turn around the longitudinal axis (or less than 90°);* - *Enters the water and lands on the belly or back;* - *Grabs the edge, the swimming pool lane rope or the big noodle.* |
| (K) Treading water to point a mat with a forearm and a finger | **Correct performance if the child…**   - Stays in place with the nose above the water; - Pulls one forearm above the water (contact of the elbow with the water is allowed); - Points to the assessor’s designated mat for 5 seconds;   ***Failure if the child…***   - *Does not pull one forearm and hand completely above the water (*contact of the elbow with the water is allowed); - *Has the nose below the water surface;* - *Puts its forearm in the water during the 5 seconds;* - *Holds its pointing finger and forearm less than 5 seconds out of the water, while pointing to the mat;* - *Moves from the place (over 1 meter from the starting place);* - *Does not point the right mat.* |
| (L) Swim on the belly | **Correct performance if the child…**   - Swims on its belly using the arms and / or legs   Note: The child is allowed to lay on the belly to rest.  ***Failure if the child…***   - *Turns on the side (more than around 90°) or on the back;* - *Intentionally grabs or touches the swimming pool lane rope or attached belts.* |
| (M) Submersion of ~1,5-2m under a noodle, return on the water surface in a hoop | **Correct performance if the child…**   - Submerges its full body before the attached belts without intentionally touching it; - Swims under water; - Returns to the water surface in the hoop without intentionally touching it.   Note: The child is allowed to push the pool floor to get to the surface.  ***Failure if the child…***   - *Breaks through the water surface with any part of the body in between the noodle and the hoop;* - *Intentionally touches the noodle, hoop or swimming pool lane rope.* |
| (N) Swim on the back and taking visual information | **Correct performance if the child…**   - Swims on the back using the arms and / or legs;   Note: The child is allowed to lay on the back to rest.   - Stop at the lead assessor level, which is placed at the end of the center mat.   ***Failure if the child…***   - *Turns on the side (more than around 90°) or on the belly;* - *Stops before the end of the 2nd floating mat;* - *Does not stop when asked by the assessor.* |
| (O) Submersion under the swimming lane rope | **Correct performance if the child…**   - Submerges its full body under the swimming pole lane rope without intentionally touching it; - Swims under water; - Returns to the surface after the swimming pool lane rope without intentionally touching it.   Note: The child is allowed to push the pool floor to get to the surface.  ***Failure if the child…***   - *Breaks through the water surface with any part of the body before going behind the swimming pool lane rope;* - *Intentionally touches the swimming pool lane rope.* |
| (P) Treading water to take auditory information and providing oral information (choice) | **Correct performance if the child…**   - Treads water while the nose is above the water; - Puts its mouth above the water surface; - Listens the assessor; - Provides an oral answer to the assessor’s question.   ***Failure if the child…***   - *Moves more than a meter (exceeds the ends of the floating mat);* - *Put the nose in the water;* - *Is not able to provide an oral answer to the assessor's question.* |
| (Q) Going under the swimming pool lane rope without touching it, returning to the water surface, coming back to the starting lane by doing the same | **Correct performance if the child…**   - Submerges to go under the swimming pool lane rope without intentionally touching it; - Returns to the water surface in the next swimming pool lane rope; - Repeats it to come back to the starting lane.   Note: The child is allowed to push the pool floor to get to the surface.  ***Failure if the child…***   - *Cannot go under the swimming pool lane rope;* - *Intentionally touches or grabs the swimming pool lane rope.* |
| (R) Free choice swim until the next floating mat | **Correct performance if the child…**   - Swims in the indicated direction using the arms and / or legs.   Note: The child is allowed to:   - Lay on the back or belly to rest; - Switch position (belly, back, costal).   ***Failure if the child…***   - *Intentionally touches the material, the swimming pool lane rope, or the wall.* |
| (S) Exit the water by climbing up the floating mat | **Correct performance if the child…**   - Uses the floating mat to climb and exit the water; - Kneels on the floating mat and raises up hands during 3 seconds.   ***Failure if the child…***   - *Is not able to climb up the floating mat;* - *Is not able to kneel on the floating mat;* - *Is not able to put his/her hands up during 3 seconds.* |
