# Supplementary material
Source: Research Square preprint supplement (doi:10.21203/rs.3.rs-9232817/v1)
Supplement: Supplementary file 2 [file caac7d77aac8fb18c53a859b.docx]

**Appendix 1**

*List of Instructions and Criteria for the Isolated Tasks (first practical component in the ALFAC test battery)*

| Tasks | Description of the test instructions | Criteria |
| --- | --- | --- |
| (A.1) Entry 1 | 1. Enter the water facing the ladder and climbing down the ladder. 2. Climb down the ladder until your shoulders are below the water level. 3. Let go of the ladder with both hands and feet and stay freely in the water for at least 3 seconds. I will count to 3 out loud. | ***Failure if the child…***   - *Climbs down the ladder with the shoulders still above the water level* - *Always keeps contact with the ladder with feet, hands or arms* - *Is letting go of the ladder with both hands and feet for less than 3 seconds* |
| (A.2) Entry 2 | 1. Sit on the edge of the fixed floating mat, with your knees bent and feet hanging in the water. 2. Gently leave the fixed floating mat and slide into the water with your body.   (E) Let go of the fixed floating mat with both hands and feet and stay freely in the water for at least 3 seconds. I will count to 3 out loud. | ***Failure if the child…***   - *Stays seated on the edge of the fixed floating mat* - *Always keeps contact with the mat with feet, hands or arms* - *Is letting go of the fixed floating mat with both hands and feet for less than 3 seconds* |
| (A.3) Entry 3 | 1. Stand upright near the edge of the fixed floating mat facing the water. 2. Take a big step forward with one foot first to enter the water.   (E) Stay freely in the water for at least 3 seconds. I will count to 3 out loud. | ***Failure if the child…***   - *Stays standing upright near the edge of the fixed floating mat facing the water* - *Turns towards or grabs the mat during entry in the water* - *Jumps into the water and lands on the belly or the back* - *Stays freely in the water for less than 3 seconds* |
| (A.4) Entry 4 | 1. Stand with bent knees near the edge of the fixed floating mat facing the water and put your hands on your knees. Make yourself small, bringing your chin to your chest and your chest to your thighs. 2. Tilt / roll forward into the water while maintaining this position. Do not touch your face or any other body part (except for your knees that you are grabbing) while entering the water. 3. Stay freely in the water for at least 3 seconds. I will count to 3 out loud. | ***Failure if the child…***   - *Stands with bent knees near the edge of the fixed floating mat facing the water, but not putting the hands on the knees* - *Is not tilting / rolling forward into the water, but landing flat on the belly* - *Is not tilting / rolling forward into the water, but jumping with feet first* - *Touches the face or any other body part (except for the knees) with the hands while entering the water* - *Stays freely in the water for less than 3 seconds* |
| (A.5) Entry 5 | 1. Stand with bent knees near the edge of the fixed floating mat with your back turned to the water and grab your knees from behind. Make yourself small, bringing your chin to your chest and your chest to your thighs. 2. Tilt / roll backward into the water while maintaining this position. Do not touch your face or any other body part (except for your knees that you are grabbing) while entering the water. 3. Stay freely in the water for at least 3 seconds. I will count to 3 out loud. | ***Failure if the child…***   - *Is standing with bent knees near the edge of the fixed floating mat with the back turned to the water but not grabbing the knees from behind* - *Is not tilting / rolling backward into the water, but landing flat on the back* - *Touches the face or any other body part (except for the knees) with the hands while entering the water* - *Stays freely in the water for less than 3 seconds* |
| (B.1) Exit 1 | 1. You are in the deep water facing the ladder. 2. Climb up the ladder to get out of the water in less than 5 seconds.   (E) Let go of the ladder with both hands once you are back on your feet at the pool edge. | ***Failure if the child…***   - *Is not able to climb up the ladder in less than 5 seconds* - *Is not letting go of the ladder* |
| (B.2) Exit 2 | 1. You are in the deep water facing one fixed floating mat. 2. Climb up this one fixed floating mat to get out of the water in less than 5 seconds.   (E) Sit down on your knees on the mat without any part of the body still being submerged and slightly raise your arms for 3 seconds. I will count to 3 out loud. | ***Failure if the child…***   - *Is not able to climb up the fixed floating mat in less than 5 seconds* - *Is not sitting on the knees* - *Does not let go of the fixed floating mat with any hand* - *Is letting go of the fixed floating mat with only one hand* - *Is letting go of the fixed floating mat with both hands for less than 3 seconds* |
| (B.3) Exit 3 | 1. You are in the deep water facing two stacked fixed floating mats. 2. Climb up these two stacked fixed floating mats to get out of the water in less than 5 seconds. 3. Sit down on your knees on the mat without any part of the body still being submerged and slightly raise your arms for 3 seconds. I will count to 3 out loud. | ***Failure if the child…***   - *Is not able to climb up the two stacked fixed floating mats in less than 5 seconds* - *Is not sitting on the knees* - *Does not let go of the two stacked fixed floating mats with any hand* - *Is letting go of the two stacked fixed floating mats with only one hand* - *Is letting go of the two stacked fixed floating mats with both hands for less than 3 seconds* |
| (B.4) Exit 4 | 1. You are in the deep water facing one free floating mat. 2. Climb up this one free floating mat to get out of the water in less than 5 seconds. 3. Sit down on your knees on the mat without any part of the body still being submerged and slightly raise your arms for 3 seconds. I will count to 3 out loud. | ***Failure if the child…***   - *Is not able to climb up the free floating mat in less than 5 seconds* - *Is not sitting on the knees* - *Does not let go of the free floating mat with any hand* - *Is letting go of the free floating mat with only one hand* - *Is letting go of the free floating mat with both hands for less than 3 seconds* |
| (B.5) Exit 5 | 1. You are in the deep water facing two stacked free floating mats. 2. Climb up these two stacked free floating mats to get out of the water in less than 5 seconds.   (E) Sit down on your knees on the mat without any part of the body still being submerged and slightly raise your arms for 3 seconds. I will count to 3 out loud. | ***Failure if the child…***   - *Is not able to climb up the two stacked free floating mats in less than 5 seconds* - *Is not sitting on the knees* - *Does not let go of the two stacked free floating mats with any hand* - *Is letting go of the two stacked free floating mats with only one hand* - *Is letting go of the two stacked free floating mats with both hands for less than 3 seconds* |
| (C) Breathing | 1. You are in the deep water with your chin and ears out of the water, while holding on to the ladder with both hands and watching the assessor. 2. Take one short deep breath and immediately submerge your head completely and exhale through your mouth or nose for a long time, while making big bubbles under water. Repeat this rhythmic task for 5 times in a row, without letting go of the ladder with neither of your hands. I will count the number of repetitions for you.   (E) After 5 repetitions (or when you can no longer perform / continue the task), you can stop the task. | ***Do not count the breathing cycle if the child…***   - *Does not make bubbles under water* - *His or her face is not fully submerged (hairline as reference)* - *Does not apply the correct breathing rhythm of in- and exhalation* - *Is letting go of the ladder with one or both hands.* |
| (D) Treading water | 1. You are in the deep water with your face out of the water and watch the assessor. I will give you a start sign. 2. Stay in place in the deep water for as long as you can. Hold your mouth out of the water while watching the assessor and treading the water for which you may use your arms and / or legs. I will count the seconds. Every 15 seconds, you call out “NEMO*” loud and clear.   (E) When the assessor gives a sign (or when you can no longer perform / continue the task), you can stop the task. | Time in seconds (maximal = 120 seconds)  ***The test stops if the child…***   - *Puts the nose a first time in the water* |
| (E) Propulsion on the belly | 1. Go into the water all together (6 children) after this explanation. Once you are freely in the deep water at the starting cone (in a vertical position facing the swimming lane), I will give you a start sign. The task will be performed by 2 children together. If you are waiting to start, you can hold on to the lane rope or pool edge. 2. After the start sign, you let go and start swimming as far as possible during 2min while staying on your belly (with your head above and / or below the water surface) using your legs and / or arms, up to the other cone. Once you are at the level of that second cone*, immediately turn around, do not stop, and continue swimming while staying on your belly, back to the starting cone*. At that point, turn around again, and so on. Try not to touch the wall, the swimming lane rope or bottom of the pool during the performance of this test. If you come close to the feet of the child in front, you can pass him / her without disturbing him / her.   (E) Continue this task until the assessor gives a sign (or when you can no longer perform / continue the task (e.g., by holding onto the edge of the swimming pool). When you finish the task, you should stay in place holding on to the lane rope or pool edge to not interfere with the children still swimming | Distance covered in m  [+ Time registration in seconds]  ***The test stops if the child…***   - *Holds on to the lane rope or pool edge after the start sign* - *Intentionally touches the ground with the feet* - *Turns on its back or side and continues to swim that way* |
| (F) Propulsion on the back | 1. You are freely in the deep water at the starting cone (in a vertical position with your back turned to the swimming lane), I will give you a start sign. The task will be performed by 2 children together. If you are waiting to start, you can hold on to the lane rope or pool edge. 2. After the start sign, you let go and start swimming as far as possible for 2min while staying on your back (with your head above and / or below the water surface) using your legs and / or arms, up to the other cone. Once you are at the level of that second cone*, immediately turn around, do not stop, and continue swimming while staying on your back, back to the starting cone. At that point, turn around again, and so on. Try not to touch the wall, the swimming lane rope or bottom of the pool during the performance of this test. If you come close to the feet of the child in front, you can pass him / her without disturbing him / her.   (E) Continue this task until the assessor gives a sign (or when you can no longer perform / continue the task (e.g., by holding onto the edge of the swimming pool). When you finish the task, you should stay in place holding on to the lane rope or pool edge to not interfere with the children still swimming. When all the children have finished the task, the assessor will give you a sign to come out of the water all together. | Distance covered in m  [+ Time registration in seconds]  ***The test stops if the child…***   - *Holds on to the lane rope or pool edge after the start sign* - *Intentionally touches the ground with the feet* - *Turns on its belly or side and continues to swim that way* |
| (G) Submersion | 1. All children go to the starting zone of the submersion task in the deep water. The task will be performed one by one. The other children hold on to the lane rope until it is their turn to start. 2. After the start sign, let go of the noodle, take a deep breath, and subsequently submerge your full body about 1m below the water surface. Swim underneath the noodle (without touching it) and continue to swim under water as far as possible (without touching the bottom of the swimming pool and without any body part breaking through the water surface).   (E) The task stops if you break through the water surface with any part of your body or if you touch the floor / bottom (when you can no longer perform / continue the task). When you finish the task, you should stay in place holding on to the lane rope or pool edge. | Distance covered in m  [+ Time registration in s]  ***The test stops if the child…***   - *Intentionally touches the noodle with any part of its body to gain distance (Touching occasionally is tolerated)* - *Breaks through the water surface with any part of its body* |
| (H.1) Rotation 1: Vertical rotation | 1. Go into the water after this explanation. Once you are freely in the deep water with your face out of the water, you watch the assessor. I will give you a start sign. 2. After the start sign, turn around in a vertical position without touching the edge. Hold your nose out of the water and scan the environment (like a lighthouse, with your eyes representing the lights) while turning around. Do not look at the ceiling.   (E) When the assessor gives a sign or you can no longer perform the task, you can stop the task. | ***Failure if the child…***   - *Put his/her nose in the water during the rotation* |
| (H.2) Rotation 2: Lying rotation | 1. Leave the edge. Once you are freely in the deep water laying on your back, watching the ceiling, the assessor will give you a start sign. 2. After the start sign, turn around in a horizontal axis to face down with your face immerged, and then turn again in the horizontal axis to face up.   (E) When the assessor gives a sign or you can no longer perform the task, you can stop the task. | ***Failure if the child…***   - *Do not face up and down during the rotation* - *Do not immerged his/her face when passing on the belly* |
| (H.3) Rotation 3: Titling rotation | 1. Leave the edge. Once you are freely in the deep water laying on your back, watching the ceiling, the assessor will give you a start sign. 2. After the start sign, tilt your body from your back to your belly (with both of your heels coming out of the water) and back to your back (with your toes of both feet coming out of the water) using your arms and legs.   (E) When the assessor gives a sign or you can no longer perform the task, you can stop the task. | ***Failure if the child…***   - *Any toe does not come out of the water when turning on the back* - *Any heel does not come out of the water when turning on the belly* |
| (H.4) Rotation 4: Forward rotation | 1. Go into the water after this explanation. Once you are freely in the deep water with your face out of the water, you watch the assessor. I will give you a start sign. 2. Turn forward in the water with headfirst, roll and come back to the surface with headfirst.   (E) When the assessor gives a sign or you can no longer perform the task, you can stop the task. | ***Failure if the child…***   - *Do not make a complete 360°turn* - *Do not start and finish the turn with head first* |
| (H.5) Rotation 5: Backward rotation | 1. Go into the water after this explanation. Once you are freely in the deep water with your face out of the water, you watch the assessor. I will give you a start sign. 2. Turn backward in the water with headfirst, roll and come back to the surface with headfirst.   (E) When the assessor gives a sign or you can no longer perform the task, you can stop the task. | ***Failure if the child…***   - *Do not make a complete 360°turn* - *Do not start and finish the turn with head first* |
| (I) Floating | 1. All children go to the starting zone of the floating task in the deep water. The task will be performed by 2 children together after receiving the start sign. The other children hold on to the lane rope until it is their turn to start. 2. Lay on your back on the surface of the water with the back of your head in the water watching the ceiling of the swimming pool, spread your arms and try not to move.   (E) When the assessor gives a sign (or when you can no longer perform / continue the task), you can stop the task and grab the lane rope or pool edge. | Time in seconds (maximal = 15 seconds)  ***The test stops if the child…***   - *Grabs the lane rope or pool edge* - *Lifts the back of the head from the water surface* - *Does not have the arms spread* - *Is moving the arms or legs* |

*Notes*: The test instruction description is always structured as (S) Start, (T) Task, and (E) End.
